# Supplementary material for: Genome-Wide Analysis Using Exon Arrays Demonstrates an Important Role for Expression of Extra-Cellular Matrix, Fibrotic Control and Tissue Remodelling Genes in Dupuytren's Disease
Source: PLoS One. 2013 Mar 12;8(3):e59056. doi: 10.1371/journal.pone.0059056 (PMC3595223; doi:10.1371/journal.pone.0059056)
Supplement: Table S1 — PCR primer sequences. (XLSX) [file pone.0059056.s003.xlsx]

## Sheet: Table S1_DD primers
Table S1. PCR primer sequences
Name*	PSR	Forward (5'-3')	Reverse (5'-3')	Annealing temp. (oC)
COL15A1	685-763	GGTGGAACCGCTTCGCCATGA	GGGATGCGGCTGTGCTCCTC	60
FGF9	910	AAGCACGTGGACACTGGAAGGC	TAGTCCCTTCTCTCGGGGTCCCA	60
FST	409	GTCTGTGCCAGTGACAATGC	GTCTTCCGAAATGGAGTTGC	60
INHBA	596	GGGCAAAGTCGGGGAGAACGG	CCTGGCTGTTCCTGACTCGGC	60
KIF14	403	ACCACCCATTGCTTCCCTGAGT	ACAAGTTTCCTGTTCCCAACACTTTGA	60
KIF23	839	GCAAGGCGTAGGCAGCAGGA	GGAACCACCTCCCTGCCTTCAGT	60
KRT34	912	TCCTGACCCAAGCAAAGACACACA	ACAGGCTCGACCCTCAACAGGA	60
MPP1	817	GTTGCAGCTCATGAACTCGGCCA	TCCTGAGCTAGCTGAACATCACCAC	60
PGK	reference gene	CTGGAGAACCTCCGCTTTCAT	TGGCTCGGCTTTAACCTTGTT	60
STAT1	299	CGTTACTGAAGAGCTTCACTCCCTT	TCGAGGTCAATTACCAAACCAGGC	60
* Gene names are followed by the last three digits of the PSR identification number. PSR: Probe Selection Region
