# Supplementary material for: Genome-Wide Analysis Using Exon Arrays Demonstrates an Important Role for Expression of Extra-Cellular Matrix, Fibrotic Control and Tissue Remodelling Genes in Dupuytren's Disease
Source: PLoS One. 2013 Mar 12;8(3):e59056. doi: 10.1371/journal.pone.0059056 (PMC3595223; doi:10.1371/journal.pone.0059056)
Supplement: Table S2 — Genes that show higher gene expression in DD samples with a p-value of <0.05 and a fold change of >2. (XLSX) [file pone.0059056.s004.xlsx]

## Sheet: TS2-DD genes up
Table S2. Genes that show higher gene expression in DD samples with a p-value of <0.05 and a fold change of >2
Gene Symbol	Gene ID (RefSeq)	p-value	Fold-Change(Control vs. DD)	Fold change direction
VCAM1	NM_001078	5.07375e-11	-35.1342	CL down vs DD
COMP	NM_000095	8.61318e-21	-34.3401	CL down vs DD
SFRP4	NM_003014	0.0110431	-30.7416	CL down vs DD
CHI3L1	NM_001276	2.85901e-16	-20.9531	CL down vs DD
DDIT4	NM_019058	7.8036e-10	-17.4606	CL down vs DD
SCRG1	NM_007281	3.50398e-19	-14.576	CL down vs DD
C10orf10	NM_007021	0.000436076	-13.2329	CL down vs DD
FGF9	NM_002010	0.00457335	-11.8243	CL down vs DD
FMOD	NM_002023	0.00190699	-9.95692	CL down vs DD
KRT34	NM_021013	1.53077e-06	-9.59421	CL down vs DD
CHAC1	NM_024111	0.00700224	-9.54938	CL down vs DD
CADM1	NM_014333	2.70964e-10	-9.35959	CL down vs DD
THBS4	NM_003248	1.3985e-30	-8.74083	CL down vs DD
PTPRD	NM_002839	5.85524e-29	-8.59582	CL down vs DD
CRLF1	NM_004750	1.98228e-27	-8.46392	CL down vs DD
SPON1	NM_006108	4.48027e-09	-7.64994	CL down vs DD
PAPPA2	NM_020318	1.11028e-36	-7.16121	CL down vs DD
ANGPTL4	NM_139314	2.95966e-11	-6.89301	CL down vs DD
PFKFB4	NM_004567	6.37262e-23	-6.27251	CL down vs DD
DACT1	NM_016651	1.063e-15	-6.24109	CL down vs DD
C7orf68	NM_013332	0.000941681	-5.78641	CL down vs DD
NRCAM	NM_001193582	6.6767e-23	-5.72873	CL down vs DD
SLC2A5	NM_003039	1.97232e-25	-5.64975	CL down vs DD
NDUFA4L2	NM_020142	0.00247754	-5.64615	CL down vs DD
IL26	NM_018402	0.000114561	-5.58784	CL down vs DD
CILP2	NM_153221	5.1176e-24	-5.41481	CL down vs DD
ANKRD37	NM_181726	0.000196107	-5.39884	CL down vs DD
DAPK1	NM_004938	3.2434e-09	-5.29651	CL down vs DD
CPA4	NM_016352	0.0385089	-5.18093	CL down vs DD
RBP4	NM_006744	0.000246731	-5.17563	CL down vs DD
LOXL3	NM_032603	0.00269653	-5.08977	CL down vs DD
MOCOS	NM_017947	4.28727e-08	-5.00414	CL down vs DD
ASPHD2	NM_020437	1.16167e-06	-4.91587	CL down vs DD
UNC5B	NM_170744	1.6758e-08	-4.90931	CL down vs DD
WNT2	NM_003391	1.39065e-05	-4.82891	CL down vs DD
SPAG4	NM_003116	7.89528e-23	-4.60329	CL down vs DD
RDH10	NM_172037	0.0131366	-4.58245	CL down vs DD
TRIB3	NM_021158	3.66566e-09	-4.46002	CL down vs DD
APLN	NM_017413	2.05624e-08	-4.34215	CL down vs DD
MSC	NM_005098	0.000540034	-4.33854	CL down vs DD
MTHFD2	NR_027405	0.00199934	-4.3355	CL down vs DD
CPZ	NM_001014448	6.94122e-11	-4.28206	CL down vs DD
COL15A1	NM_001855	0.00117903	-4.26303	CL down vs DD
SLC7A5	NM_003486	2.07682e-06	-4.25905	CL down vs DD
PDLIM3	NM_014476	4.78668e-05	-4.22887	CL down vs DD
TFAP2B	NM_003221	3.29585e-09	-4.17167	CL down vs DD
CXCL16	NM_022059	1.18667e-07	-4.15755	CL down vs DD
PRG4	NM_005807	1.75752e-10	-4.15362	CL down vs DD
SLC2A1	NM_006516	4.14046e-09	-4.13188	CL down vs DD
CBS	NM_000071	1.10105e-07	-4.1273	CL down vs DD
TPD52L1	NM_001003395	0.0418387	-4.05934	CL down vs DD
MPP7	NM_173496	4.84299e-05	-4.02996	CL down vs DD
PALM	NM_002579	5.82422e-12	-4.02615	CL down vs DD
STAC	NM_003149	0.00161254	-3.95684	CL down vs DD
VLDLR	NM_003383	2.66372e-11	-3.94901	CL down vs DD
IER3	NM_003897	3.4997e-08	-3.93968	CL down vs DD
KCTD15	NM_024076	0.000249162	-3.93457	CL down vs DD
SLC6A9	NM_201649	1.06482e-22	-3.88253	CL down vs DD
BOK	NM_032515	0.0310905	-3.83128	CL down vs DD
ITGA11	NM_001004439	3.36118e-15	-3.8181	CL down vs DD
GSC	NM_173849	5.42486e-10	-3.76618	CL down vs DD
ABLIM1	NM_002313	4.19922e-17	-3.76294	CL down vs DD
PCK2	NM_004563	4.61815e-22	-3.74174	CL down vs DD
GALNTL4	NM_198516	2.43137e-19	-3.7284	CL down vs DD
EYA4	NM_004100	3.06566e-24	-3.68832	CL down vs DD
PFKFB3	NM_004566	1.16783e-06	-3.66686	CL down vs DD
SERPINA3	NM_001085	0.00161289	-3.64863	CL down vs DD
GPT2	NM_001142466	1.72867e-08	-3.63693	CL down vs DD
SEL1L3	NM_015187	2.3359e-07	-3.57735	CL down vs DD
COL5A1	NM_000093	8.23802e-25	-3.57201	CL down vs DD
FLJ40536	AK097855	2.81142e-05	-3.55258	CL down vs DD
SESN2	NM_031459	8.09641e-11	-3.52325	CL down vs DD
KCNG1	NM_002237	0.0274554	-3.47133	CL down vs DD
SORBS2	NM_021069	3.36265e-18	-3.46938	CL down vs DD
ARHGAP28	NM_001010000	3.39449e-05	-3.39836	CL down vs DD
SYNPO	NM_007286	4.20165e-36	-3.36392	CL down vs DD
ABCB6	NM_005689	2.49089e-19	-3.32978	CL down vs DD
PHGDH	NM_006623	1.73246e-08	-3.30993	CL down vs DD
ELN	NM_000501	7.19226e-11	-3.28479	CL down vs DD
SULF2	NM_018837	7.62717e-08	-3.28351	CL down vs DD
PDK3	NM_001142386	1.98154e-06	-3.28174	CL down vs DD
NDRG1	NM_001135242	3.73431e-15	-3.25238	CL down vs DD
NUAK1	NM_014840	0.016143	-3.1817	CL down vs DD
SYBU	NM_001099744	0.0120162	-3.17094	CL down vs DD
FKBP4	NM_002014	5.13358e-06	-3.1628	CL down vs DD
MIF	NM_002415	0.0218613	-3.14781	CL down vs DD
HOXA13	NM_000522	3.69698e-14	-3.14483	CL down vs DD
KCNH1	NM_172362	0.0235551	-3.13922	CL down vs DD
HIST1H1C	NM_005319	0.00115433	-3.10989	CL down vs DD
EIF4EBP1	NM_004095	4.81873e-06	-3.07336	CL down vs DD
MKNK2	NM_199054	4.64968e-10	-3.07208	CL down vs DD
KIAA1244	NM_020340	7.68192e-19	-3.01181	CL down vs DD
WARS	NM_004184	3.84038e-05	-2.94143	CL down vs DD
FGF11	NM_004112	0.00399185	-2.93097	CL down vs DD
NEDD9	NM_001142393	0.000101485	-2.91829	CL down vs DD
MAF	NM_001031804	1.76097e-06	-2.9066	CL down vs DD
VWA5A	NM_001130142	2.11235e-05	-2.89242	CL down vs DD
TXNIP	NM_006472	0.0202962	-2.89179	CL down vs DD
SYT7	NM_004200	0.000240573	-2.88232	CL down vs DD
NFKBIZ	NM_031419	2.02689e-14	-2.86239	CL down vs DD
ALPL	NM_000478	0.0289417	-2.85537	CL down vs DD
GALNT13	NM_052917	4.18408e-09	-2.85467	CL down vs DD
LONP1	NM_004793	5.79189e-17	-2.84375	CL down vs DD
ZNF395	NM_018660	6.75132e-07	-2.83945	CL down vs DD
THBS3	NM_007112	0.000461915	-2.81879	CL down vs DD
ARHGEF2	NM_001162383	1.6502e-14	-2.81828	CL down vs DD
CSF2RB	NM_000395	0.000181808	-2.79497	CL down vs DD
KCND3	NM_004980	0.00800388	-2.78963	CL down vs DD
LSP1	NM_002339	6.11095e-08	-2.78337	CL down vs DD
CYGB	NM_134268	0.0349427	-2.78062	CL down vs DD
ADM2	NM_024866	4.32331e-17	-2.77515	CL down vs DD
PVR	NM_006505	0.0282172	-2.77403	CL down vs DD
KIAA1324L	NM_001142749	0.00130433	-2.76669	CL down vs DD
LOXL2	NM_002318	5.90766e-10	-2.76391	CL down vs DD
SERPINH1	NM_001235	5.98346e-05	-2.74284	CL down vs DD
KCNT2	NM_198503	0.000901647	-2.7415	CL down vs DD
KLHL35	NM_001039548	0.0205232	-2.73809	CL down vs DD
TYMP	NM_001113756	9.23278e-17	-2.70951	CL down vs DD
CECR5	NM_033070	1.80574e-06	-2.68546	CL down vs DD
CYR61	NM_001554	7.1214e-06	-2.66734	CL down vs DD
IL27RA	NM_004843	0.000105739	-2.65751	CL down vs DD
COL4A4	NM_000092	1.89713e-20	-2.65467	CL down vs DD
C1orf113	NM_001162530	9.40549e-09	-2.65357	CL down vs DD
TP53I11	NM_001076787	0.0221777	-2.64661	CL down vs DD
MAPK11	NM_002751	1.36245e-07	-2.63789	CL down vs DD
NTRK3	NM_001007156	3.39965e-06	-2.63731	CL down vs DD
PGM1	NM_002633	4.43964e-12	-2.62812	CL down vs DD
CGREF1	NM_006569	0.00499893	-2.61787	CL down vs DD
SNORD49A	NR_002744	0.00580487	-2.60345	CL down vs DD
ITGB2	NM_000211	4.67705e-09	-2.60311	CL down vs DD
FOSL2	NM_005253	1.19825e-06	-2.59105	CL down vs DD
SOX4	NM_003107	1.31322e-11	-2.5901	CL down vs DD
TM6SF1	NM_023003	1.08681e-05	-2.56537	CL down vs DD
DBC1	NM_014618	3.78631e-09	-2.56524	CL down vs DD
C21orf33	NM_004649	0.00194418	-2.56517	CL down vs DD
ANKZF1	NM_018089	1.18849e-10	-2.5617	CL down vs DD
CILP	NM_003613	0.000955066	-2.5557	CL down vs DD
GYS1	NM_002103	1.76314e-11	-2.54916	CL down vs DD
GATA6	NM_005257	2.84777e-12	-2.54569	CL down vs DD
ADAMTS10	NM_030957	4.34405e-21	-2.54557	CL down vs DD
SBNO2	NM_014963	1.27713e-21	-2.54349	CL down vs DD
SMO	NM_005631	2.60448e-09	-2.5308	CL down vs DD
ACSS1	NM_032501	1.9261e-14	-2.52887	CL down vs DD
MAZ	NM_001042539	0.00811548	-2.50309	CL down vs DD
CADM4	NM_145296	0.00225226	-2.49898	CL down vs DD
ADAM15	NM_207196	2.06213e-05	-2.49582	CL down vs DD
ADAMTS3	NM_014243	0.0285124	-2.49419	CL down vs DD
PFKL	NR_024108	5.78384e-11	-2.49014	CL down vs DD
CLMN	NM_024734	7.02633e-06	-2.48375	CL down vs DD
JUB	NM_032876	0.00281405	-2.46058	CL down vs DD
B4GALT2	NM_003780	5.1548e-08	-2.45699	CL down vs DD
SBF1	NM_002972	9.09256e-16	-2.45623	CL down vs DD
CHST6	NM_021615	0.013581	-2.45609	CL down vs DD
PPM1M	NM_144641	0.00728072	-2.44893	CL down vs DD
MFSD10	NM_001146069	1.12167e-07	-2.44819	CL down vs DD
DHRS13	NM_144683	0.00509902	-2.44243	CL down vs DD
TIAM2	NM_012454	3.47062e-06	-2.43994	CL down vs DD
MTFP1	NM_016498	0.0117281	-2.4333	CL down vs DD
C13orf18	NM_025113	0.0443106	-2.42893	CL down vs DD
ANK3	NM_020987	4.29065e-05	-2.42411	CL down vs DD
CRIP2	NM_001312	2.88978e-07	-2.42181	CL down vs DD
TLE2	NM_003260	1.38147e-09	-2.42065	CL down vs DD
PKNOX2	NM_022062	0.000363705	-2.42041	CL down vs DD
MFI2	NM_005929	9.86777e-06	-2.41442	CL down vs DD
PTPN3	NM_002829	5.91541e-06	-2.41185	CL down vs DD
RCC1	NR_030725	1.81799e-10	-2.40364	CL down vs DD
PLOD2	NM_182943	2.19799e-16	-2.40084	CL down vs DD
EPB41L4A	NM_022140	0.00478508	-2.39677	CL down vs DD
RNF41	NM_194358	0.00258915	-2.39609	CL down vs DD
C6orf48	NM_001040437	2.15709e-11	-2.36816	CL down vs DD
WDR18	NM_024100	8.08145e-06	-2.3665	CL down vs DD
RCOR2	NM_173587	0.000973965	-2.36525	CL down vs DD
PHB	NM_002634	0.000501108	-2.3639	CL down vs DD
MARS	NM_004990	4.65236e-20	-2.36018	CL down vs DD
EFNA3	NM_004952	0.0386413	-2.36	CL down vs DD
COL5A2	NM_000393	0	-2.35919	CL down vs DD
NALCN	NM_052867	0.0119277	-2.35485	CL down vs DD
KCNJ12	NM_021012	4.58328e-06	-2.35451	CL down vs DD
GMDS	NM_001500	0.00186744	-2.35011	CL down vs DD
TSC22D3	NM_198057	6.08769e-08	-2.34979	CL down vs DD
SIK1	NM_173354	1.60302e-07	-2.3489	CL down vs DD
COL4A2	NM_001846	2.17301e-17	-2.34587	CL down vs DD
FAM174B	NM_207446	3.11177e-07	-2.34506	CL down vs DD
GDPD5	NM_030792	0.00730335	-2.34454	CL down vs DD
KLK9	NM_012315	0.00425009	-2.34066	CL down vs DD
ADAMTS2	NM_014244	3.34672e-12	-2.33958	CL down vs DD
RBCK1	NM_031229	2.85154e-07	-2.33571	CL down vs DD
PTPRU	NM_005704	0.0250259	-2.33346	CL down vs DD
PEX6	NM_000287	0.00690401	-2.33345	CL down vs DD
RCC2	NM_018715	5.20659e-07	-2.33193	CL down vs DD
ABCC3	NM_003786	2.52659e-05	-2.32085	CL down vs DD
GTPBP2	NM_019096	1.32571e-10	-2.30966	CL down vs DD
NLGN4X	NM_020742	7.63944e-09	-2.30371	CL down vs DD
C2orf19	BC031945	0.0431155	-2.30347	CL down vs DD
YBX2	NM_015982	1.43585e-06	-2.29974	CL down vs DD
EFEMP1	NM_004105	9.83604e-08	-2.29796	CL down vs DD
CD70	NM_001252	0.00424073	-2.29613	CL down vs DD
TMEM134	NM_025124	1.36337e-06	-2.29466	CL down vs DD
PTGES2	NM_025072	3.10757e-07	-2.28741	CL down vs DD
CDR2L	NM_014603	1.75773e-06	-2.28411	CL down vs DD
QSOX1	NM_002826	2.70563e-12	-2.28206	CL down vs DD
SEMA3B	NM_004636	8.29805e-06	-2.27769	CL down vs DD
NRG1	NM_013960	2.17864e-09	-2.27667	CL down vs DD
KCNK7	NM_005714	9.12385e-06	-2.26944	CL down vs DD
TPSD1	NM_012217	0.00114247	-2.26653	CL down vs DD
COL4A1	NM_001845	1.97408e-06	-2.26167	CL down vs DD
FZD1	NM_003505	0.0204564	-2.26122	CL down vs DD
PHPT1	NM_001135861	5.2323e-18	-2.25573	CL down vs DD
DCI	NM_001919	0.00141922	-2.25251	CL down vs DD
CTU1	NM_145232	0.0201761	-2.25034	CL down vs DD
FKBP10	NM_021939	6.31714e-10	-2.23312	CL down vs DD
WDR54	NM_032118	4.41018e-06	-2.23138	CL down vs DD
TUFM	NM_003321	0.0335289	-2.21475	CL down vs DD
CTDSP1	NM_021198	1.7487e-07	-2.20918	CL down vs DD
C1orf66	NM_015997	1.89328e-08	-2.20568	CL down vs DD
GGT7	NM_178026	0.0141286	-2.19297	CL down vs DD
ECSIT	NM_016581	0.00738369	-2.18533	CL down vs DD
SORCS2	NM_020777	0.0087092	-2.18482	CL down vs DD
RGL2	NM_004761	2.70481e-05	-2.17615	CL down vs DD
ABTB1	NM_172027	0.00301159	-2.17585	CL down vs DD
ARHGEF19	NM_153213	2.80033e-08	-2.17363	CL down vs DD
FCN2	NM_004108	0.0167607	-2.17063	CL down vs DD
GPI	NM_000175	3.09328e-08	-2.16987	CL down vs DD
FBP1	NM_000507	0.0298452	-2.16853	CL down vs DD
RSPO1	NM_001038633	0.000190949	-2.16685	CL down vs DD
RNPEPL1	NM_018226	6.75115e-10	-2.16672	CL down vs DD
C16orf58	NM_022744	6.57617e-06	-2.16648	CL down vs DD
TMEM121	NM_025268	0.000169857	-2.16539	CL down vs DD
MFSD3	NM_138431	0.000614593	-2.16164	CL down vs DD
NLRX1	NM_024618	0.000611263	-2.16134	CL down vs DD
ILVBL	NM_006844	0.00594253	-2.15861	CL down vs DD
CACNG6	NM_145814	0.0342673	-2.15662	CL down vs DD
TSPY26P	NR_002781	0.0214188	-2.15521	CL down vs DD
FOXP1	NM_032682	2.81958e-15	-2.15468	CL down vs DD
DGKD	NM_152879	3.55254e-09	-2.15276	CL down vs DD
CMTM3	NM_144601	8.19686e-22	-2.15103	CL down vs DD
ABCA3	NM_001089	3.25571e-05	-2.14977	CL down vs DD
NTRK2	NM_006180	0.00193641	-2.14439	CL down vs DD
KDM4B	NM_015015	1.768e-08	-2.14126	CL down vs DD
ST3GAL3	NM_174963	2.96781e-08	-2.13971	CL down vs DD
C7orf62	BC028365	0.000628274	-2.13915	CL down vs DD
METTL11A	NM_014064	0.00259298	-2.13862	CL down vs DD
EXOSC5	NM_020158	0.0253396	-2.13386	CL down vs DD
PPP1R1C	NM_001080545	0.00331631	-2.13352	CL down vs DD
PTPRO	NM_030667	5.0732e-06	-2.13151	CL down vs DD
IMMP2L	NM_032549	0.037824	-2.12903	CL down vs DD
PEX10	NM_153818	1.66631e-05	-2.12862	CL down vs DD
IMPA2	NM_014214	0.00696592	-2.12782	CL down vs DD
HIST1H4C	NM_003542	0.02317	-2.12778	CL down vs DD
MEIS3	NM_020160	0.00202568	-2.12574	CL down vs DD
HEXDC	NM_173620	8.00409e-05	-2.12374	CL down vs DD
ZNF581	NM_016535	0.0477782	-2.12291	CL down vs DD
MRPL17	NM_022061	7.77498e-11	-2.11845	CL down vs DD
MTA1	NM_004689	1.16484e-17	-2.11742	CL down vs DD
NUBP2	NM_012225	0.000903581	-2.1138	CL down vs DD
AMOTL2	NM_016201	1.22638e-10	-2.11362	CL down vs DD
LRRC23	NM_001135217	0.00302492	-2.11011	CL down vs DD
SOCS3	NM_003955	0.0070661	-2.09633	CL down vs DD
IMPDH2	NM_000884	0.00104428	-2.09448	CL down vs DD
SSTR3	NM_001051	0.0351918	-2.09261	CL down vs DD
TMEM132A	NM_017870	1.93123e-06	-2.08819	CL down vs DD
VASH1	NM_014909	0.00179791	-2.08759	CL down vs DD
TSPAN17	NM_012171	7.74758e-08	-2.08677	CL down vs DD
EFNB3	NM_001406	0.0378684	-2.08461	CL down vs DD
NAALADL1	NM_005468	2.44946e-06	-2.0795	CL down vs DD
HYOU1	NM_006389	2.34583e-10	-2.07849	CL down vs DD
IER5L	NM_203434	5.81954e-07	-2.07017	CL down vs DD
FPGS	NM_004957	0.000159067	-2.06889	CL down vs DD
SLC13A3	NM_022829	0.000650419	-2.06852	CL down vs DD
ITM2C	NM_030926	0.00135204	-2.06467	CL down vs DD
PDK1	NM_002610	1.81358e-06	-2.06407	CL down vs DD
CHP2	NM_022097	0.00260651	-2.06243	CL down vs DD
ME3	NM_001161586	0.0324546	-2.06115	CL down vs DD
STXBP2	NM_006949	4.70249e-05	-2.05951	CL down vs DD
DPYSL4	NM_006426	0.00119131	-2.05788	CL down vs DD
MLLT1	NM_005934	0.00227662	-2.05372	CL down vs DD
LMBR1L	NM_018113	0.0498986	-2.05192	CL down vs DD
TNIP1	NM_006058	0.0157078	-2.05155	CL down vs DD
CRYBB3	NM_004076	0.0127812	-2.05101	CL down vs DD
BSCL2	NM_001130702	3.92202e-06	-2.05055	CL down vs DD
HIST1H1E	NM_005321	0.000893976	-2.04984	CL down vs DD
GPR124	NM_032777	9.26234e-15	-2.04796	CL down vs DD
IGSF8	NM_052868	5.35375e-06	-2.04491	CL down vs DD
NOL3	NM_001185058	6.05758e-07	-2.04458	CL down vs DD
SLC48A1	NM_017842	0.00104107	-2.04159	CL down vs DD
TBL2	NM_012453	2.64256e-07	-2.03717	CL down vs DD
CALCB	NM_000728	0.00859335	-2.03652	CL down vs DD
HIST4H4	NM_175054	0.00661581	-2.03341	CL down vs DD
RCAN1	NM_004414	4.09076e-07	-2.03317	CL down vs DD
PPP2R2B	NM_181674	0.00531692	-2.03193	CL down vs DD
NDUFS7	NM_024407	0.0134332	-2.03055	CL down vs DD
SIAH2	NM_005067	0.000561913	-2.02949	CL down vs DD
FASTK	NM_006712	1.25564e-12	-2.02918	CL down vs DD
GPR176	NM_007223	8.95774e-10	-2.02032	CL down vs DD
RNH1	NM_002939	0.000233399	-2.01978	CL down vs DD
SMOC2	NM_022138	1.219e-08	-2.01814	CL down vs DD
ANKRD13B	NM_152345	3.21948e-06	-2.0174	CL down vs DD
BAT5	NM_021160	2.95367e-10	-2.01101	CL down vs DD
TRIB2	NM_021643	0.0384387	-2.00884	CL down vs DD
NT5DC2	NM_022908	6.156e-09	-2.0084	CL down vs DD
STK32C	NM_173575	9.87192e-07	-2.00764	CL down vs DD
MRPL12	NM_002949	0.0150537	-2.00756	CL down vs DD
DDX51	NM_175066	5.20837e-11	-2.00525	CL down vs DD
PROK2	NM_001126128	0.026788	-2.00489	CL down vs DD
GMEB2	NM_012384	9.04977e-06	-2.00384	CL down vs DD
WAS	NM_000377	7.5813e-08	-2.00349	CL down vs DD
APH1A	NM_016022	0.00543848	-2.00253	CL down vs DD
